# Supplementary material
Source: PubMed Central journal article supplement (PMC7343590)
Supplement: NIHMS1589970-supplement-2.pdf [file NIHMS1589970-supplement-2.pdf]

**A**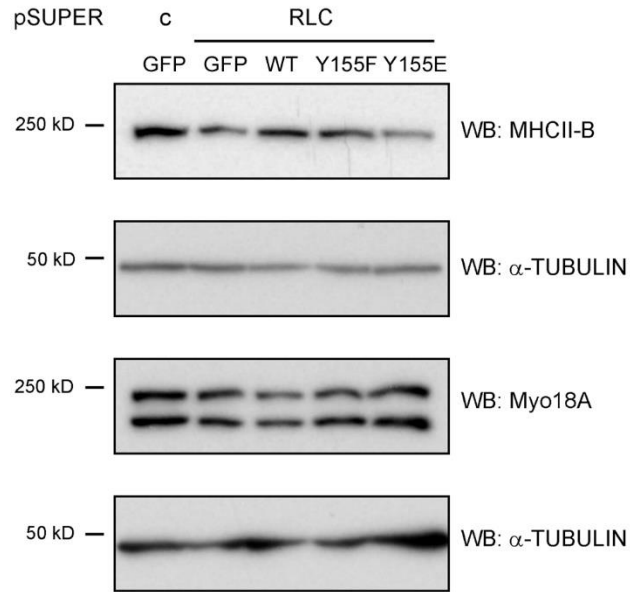**B**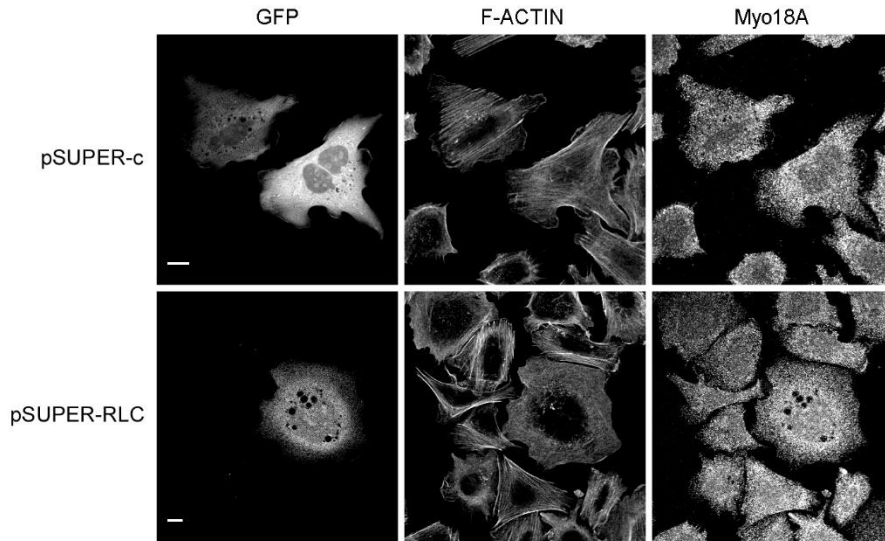**Figure S1. RLC depletion does not affect the protein levels of Myo18A. Related to Figure 3.**

(A) CHO.K1 cells were co-transfected with a control sequence (pSUPER-C) or pSUPER-RLC and GFP or the indicated RLC-GFP mutants, cultured for 96h and lysed. Lysates were separated by PAGE/SDS and blotted against MHCII-B or Myo18A. Alpha ( $\alpha$ )-tubulin is shown as a loading control. Note the decrease in the levels of MHCII-B in the pSUPER-RLC+GFP and the pSUPER-RLC+Y155E lanes, but the restoration in the wild type and Y155F lanes. Conversely, the levels of Myo18A are not altered significantly. Experiment is representative of three performed.

(B) CHO.K1 co-transfected with GFP and the indicated pSUPER vectors were allowed to spread on fibronectin, fixed and stained for Myo18A and F-actin. Note the effect of RLC depletion in the lower panels (GFP-positive cells round up and do not display large actin filaments), but the lack of depletion of Myo18A. Bars=10  $\mu$ m. Images are representative of >50 in two independent experiments.

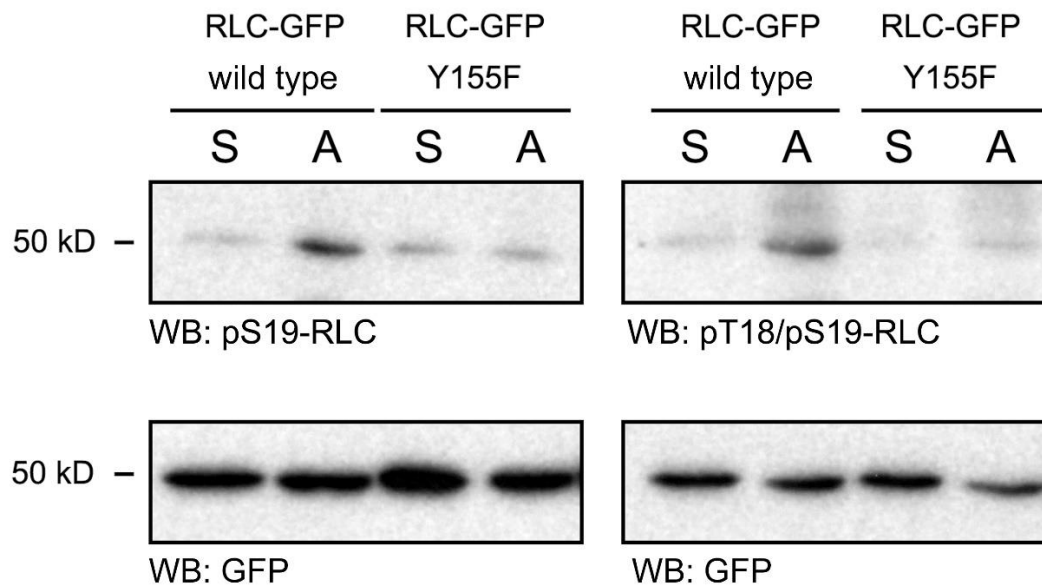

**Figure S2. RLC Y155F phosphorylation on S19 and T18/S19 is impaired in response to integrin-mediated adhesion. Related to Figure 3.**

CHO.K1 cells expressing GFP-tagged RLC or the Y155F mutant were either kept in suspension (S) or allowed to adhere to fibronectin for 1h (A) and lysed. Lysates were separated by PAGE/SDS, transferred to PVDF membrane and blotted for GFP (loading control, bottom rows), pS19 (left panels) or pT18/pS19 (right panels). Experiment is representative of three performed.

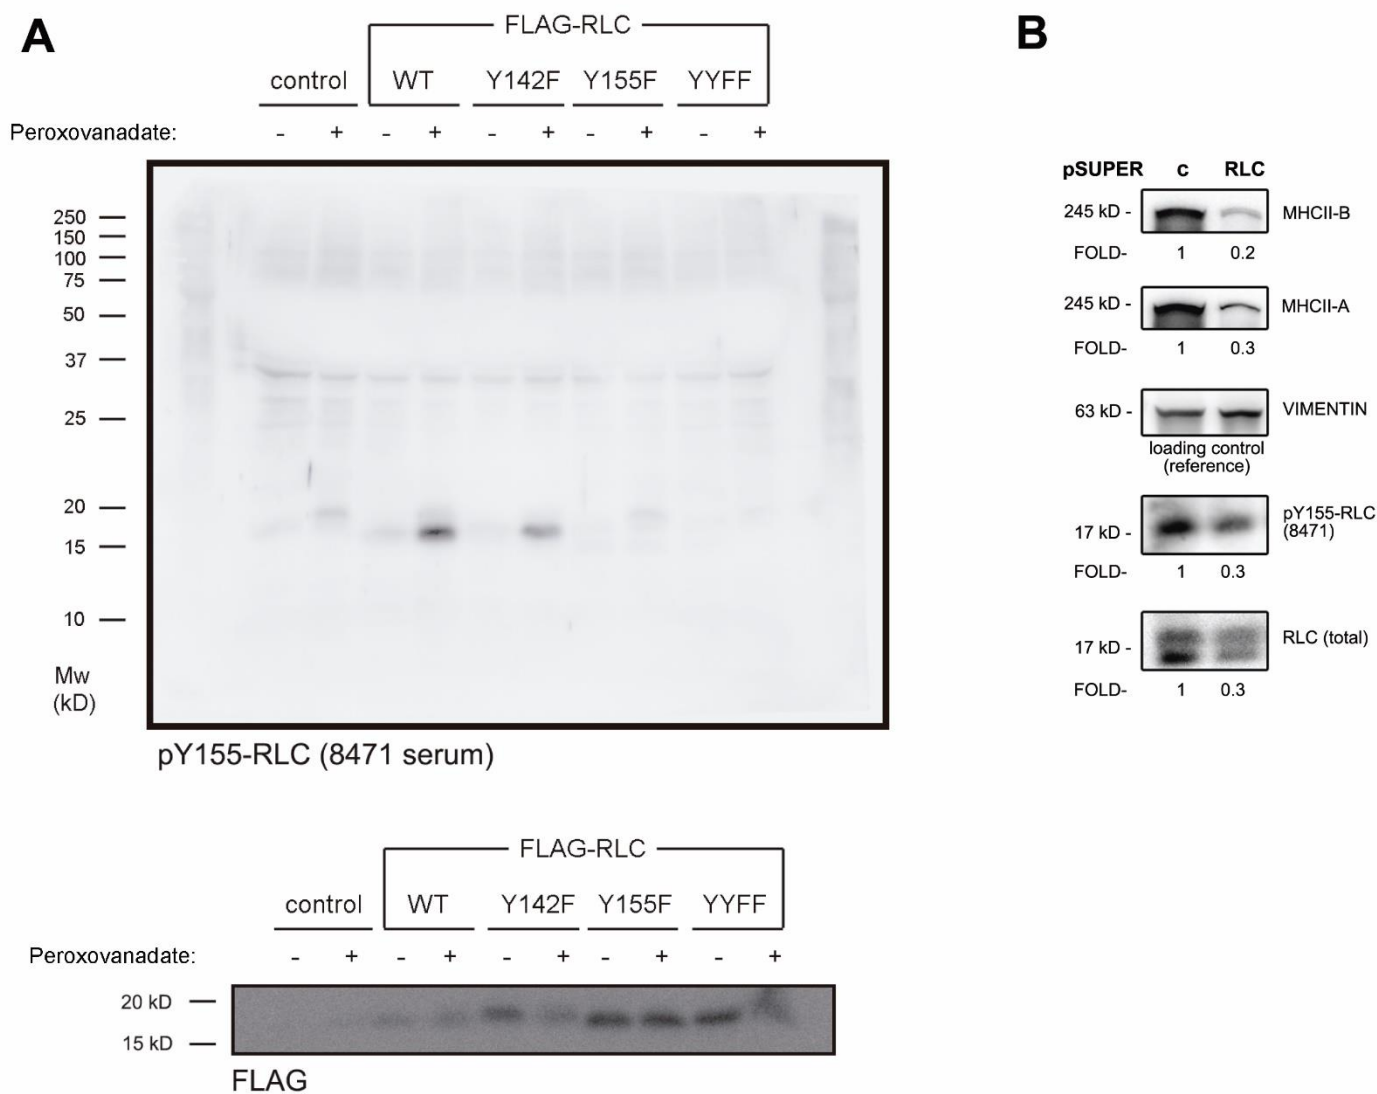

**Figure S3. The 8471 antiserum recognizes RLC phosphorylated on Y155 by Western blot. Related to Figure 5.**

(A) CHO.K1 cells were transfected, or not (control), with the indicated FLAG-RLC mutant and treated (+) or not (-) with 1 $\mu$ M sodium peroxyvanadate for 30 min. Cells were lysed and extracts blotted using the 8471 antiserum (1:1000 dilution, top panel) or anti-FLAG antibody (loading control, bottom panel).

(B) CHO.K1 cells were transfected with pSUPER-RLC or a control sequence (pSUPER-C), cultured for 96h and lysed. Lysates were separated by PAGE/SDS and blotted against pY155-RLC, MHCII-A and MHCII-B. Vimentin is shown as a loading control. Experiment is representative of five performed.

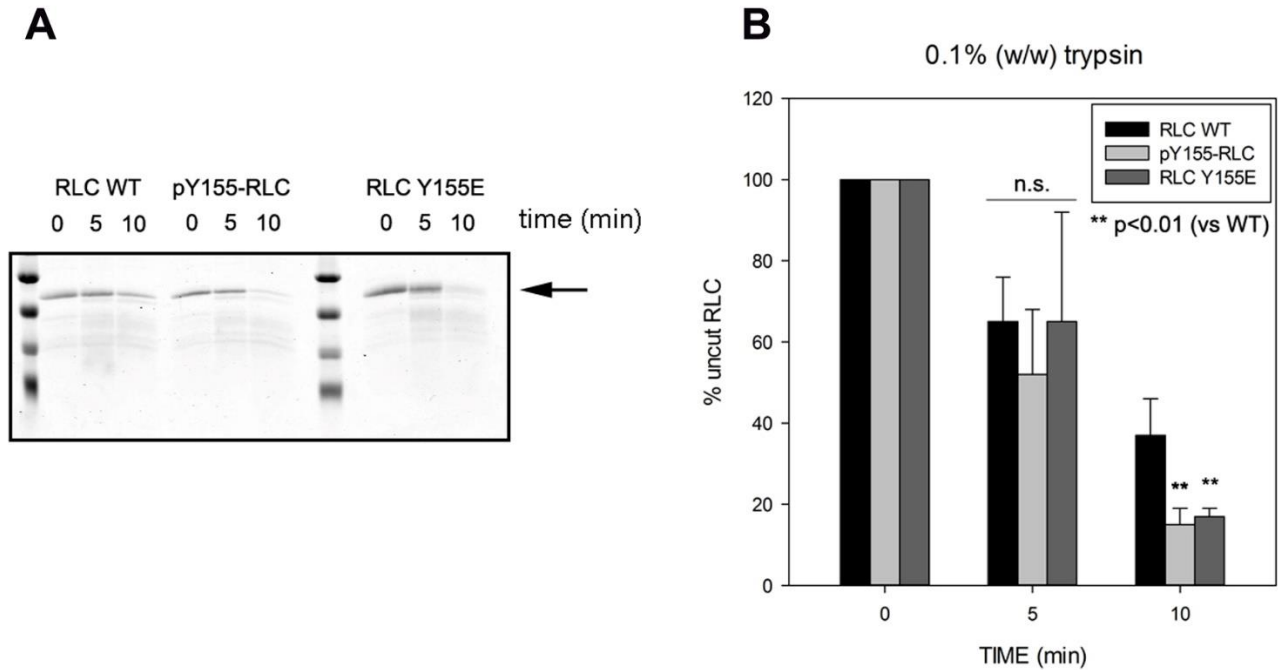

**Figure S4. Proteolytic cleavage of RLC by trypsin is increased by phosphorylation of Y155 or its substitution by Glu (E). Related to Figure 5.**

(A) Representative Coomassie staining of 1  $\mu$ g of recombinant, FLAG-tagged wild type RLC, either untreated (RLC WT) or phosphorylated on Y155 (pY155-RLC), and FLAG-RLC Y155E, treated for the indicated times with 1 ng of trypsin. Arrow points to the non-cleaved protein at different time points (0, 5 and 10 min). A representative experiment of three performed is shown.

(B) Densitometric quantification of the experiments shown in (A). A significant difference between pY155-RLC and Y155E-RLC vs. wild type is observed at 10 min incubation.

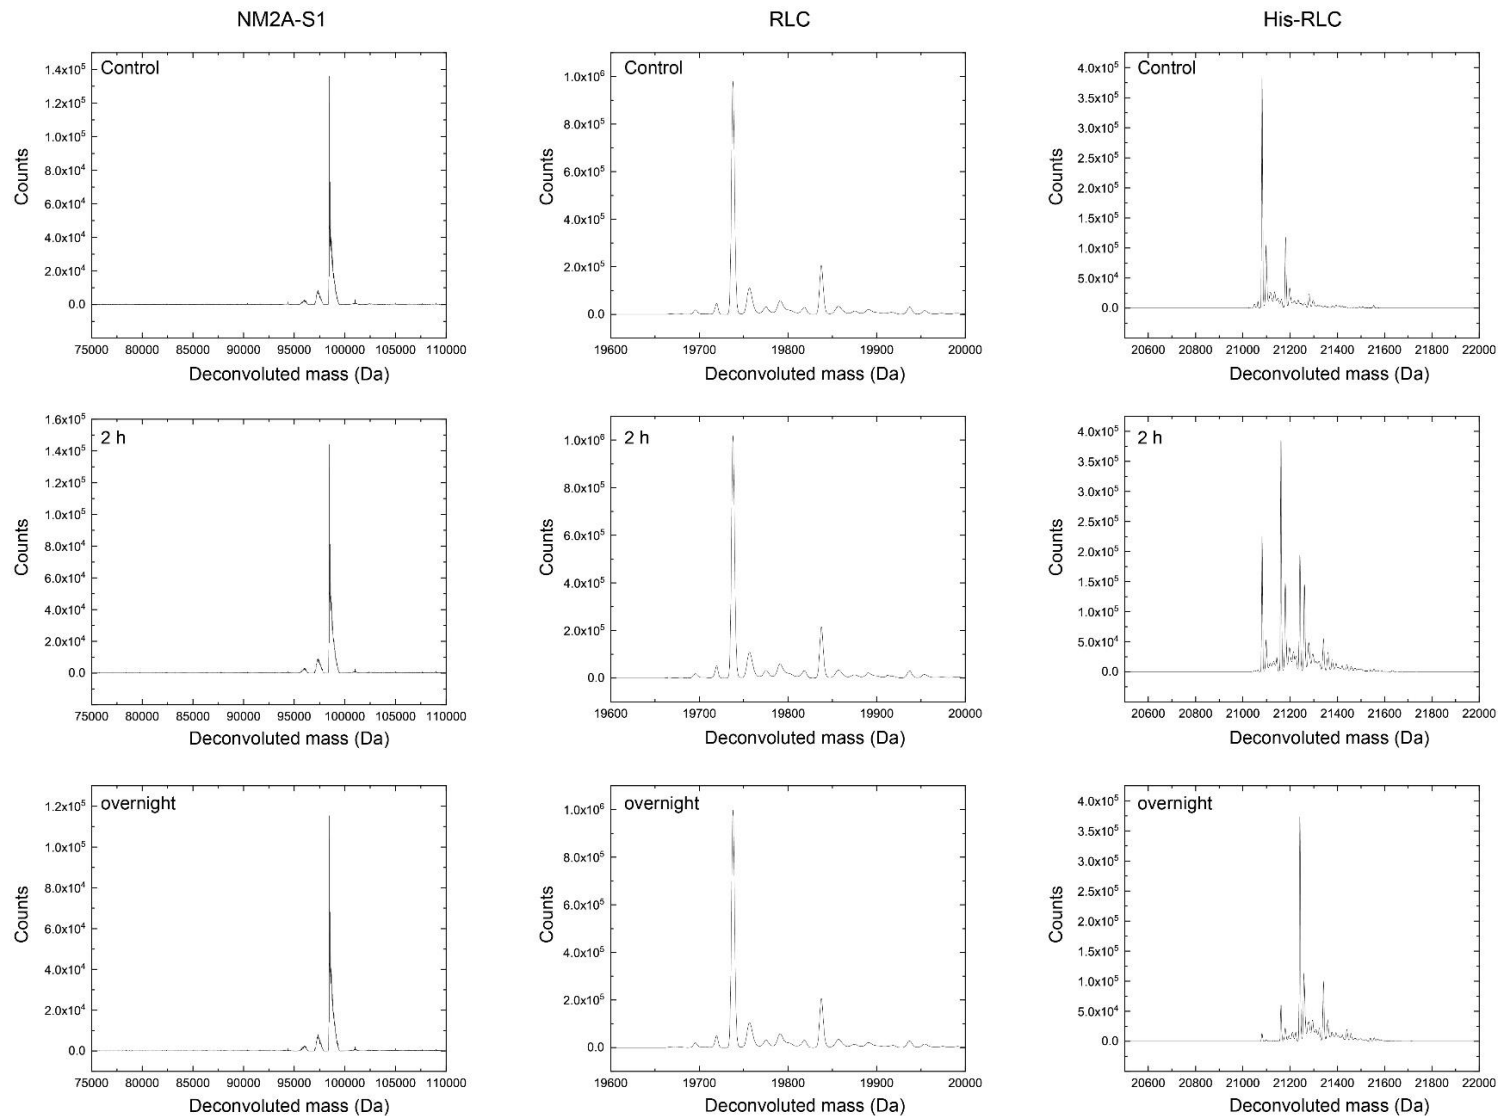

**Figure S5. Phosphorylation of free, but not S1-associated RLC determined by intact protein mass spectrometry. Related to Figure 5.**

Intact protein mass spectrometry of MHCII-A subfragment-1 and His-RLC after phosphorylation with EGFR. Deconvoluted mass spectra of the MHCII-A motor domain (left), the subfragment-1-bound RLC (center) and His-RLC (right) are shown after 2h and overnight incubation with EGFR as well as non-phosphorylated controls. Note that EGFR neither phosphorylated the MHCII-A motor domain nor the subfragment-1 bound RLC. 55.2% of the His-RLC was single phosphorylated and 23.2% double phosphorylated by EGFR after 2 hrs. Overnight incubation resulted in 11.3% single phosphorylated and 86.5% double phosphorylated His-RLC.

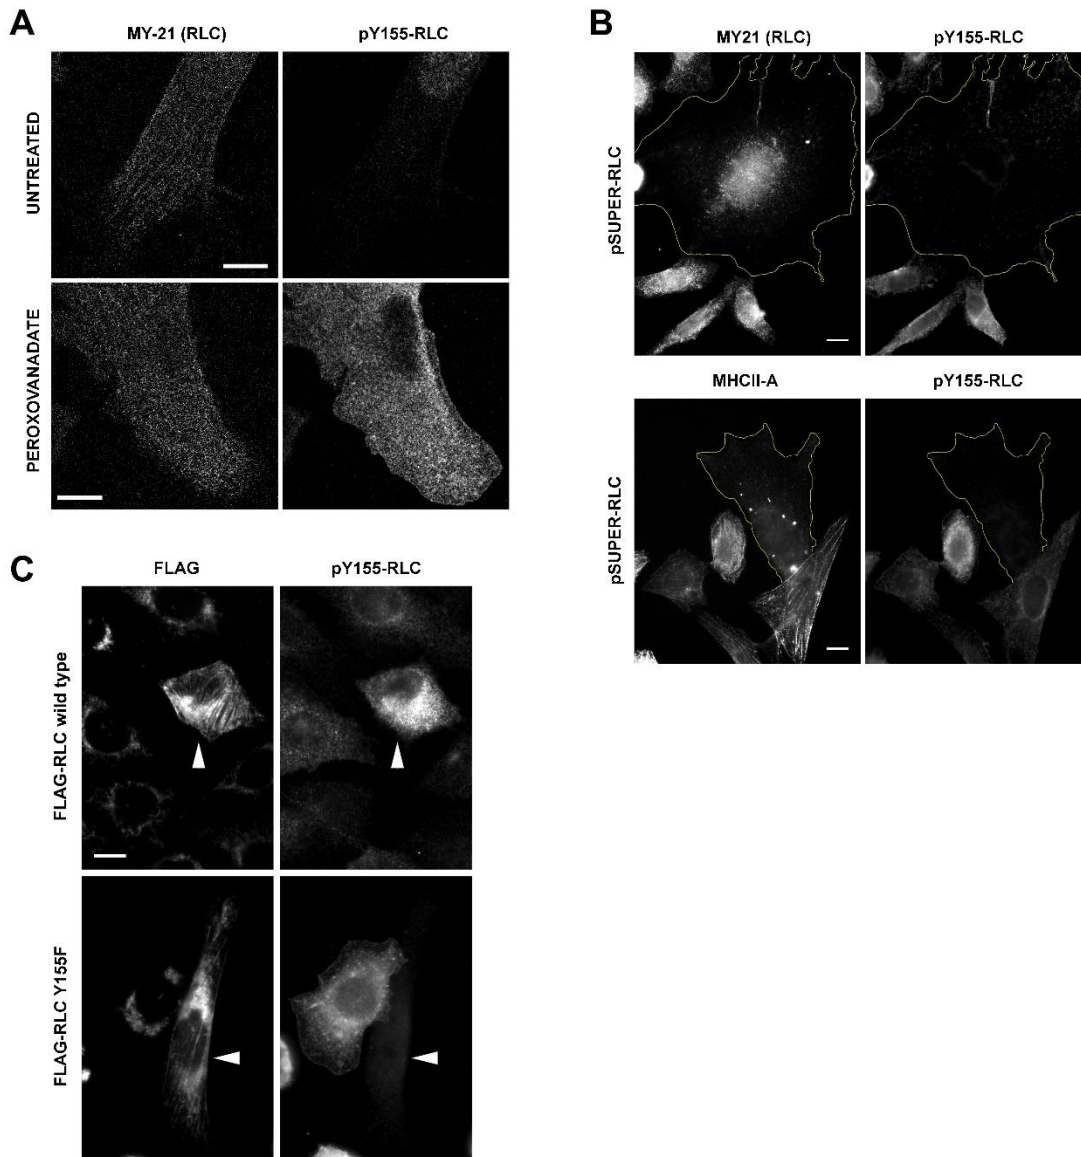

**Figure S6. The 8471 antiserum recognizes RLC phosphorylated on Y155 by indirect immunofluorescence. Related to Figure 7.**

(A) CHO.K1 cells were allowed to spread on fibronectin, either left untreated (top row) or treated with 1  $\mu$ M peroxovanadate for 30 min (bottom row). Cells were subsequently fixed and stained for RLC (MY-21, left column) or pY155 RLC (right column). Bars= 10 $\mu$ m. Images were collected and are shown using the same acquisition and representation settings. Note the increase in signal in peroxovanadate-treated cells.

(B) Representative immunofluorescence images of a RLC-depleted cell (outlined in yellow), stained for endogenous, total RLC (MY21, left) and pY155 RLC (right). Note the much bigger size and decreased MY21 signal in the RLC-depleted cell compared to the non-depleted cells at the bottom. Bars=10  $\mu$ m. Images represent >200 cells examined in three independent experiments.

(C) Representative immunofluorescence images of RLC-depleted cells rescued with FLAG-tagged RLC, wild type (top row) or Y155F (bottom row). Cells were stained for FLAG (left column) and pY155 RLC (right column). Bar=10  $\mu$ m. Arrowheads point to transfected cells. Note the increased signal in the wild type RLC-transfected cell compared to the Y155F-expressing cell. Images represent >200 cells examined in three independent experiments.

| <b>Name</b>                                        | <b>Sequence 5'-3'</b>                        |
|----------------------------------------------------|----------------------------------------------|
| pSUPER-RLC RNAi targeting sequence                 | GGGATGGCTTCATTGACAA                          |
| pSUPER-C RNAi targeting sequence (control)         | CGTACGCGGAATACTTCGA                          |
| RLC Y142E fwd primer (GT)                          | ACGAGGAGGTGGACGAGATG <b>GAAC</b> CGGGAGGCGCC |
| RLC Y142F fwd primer (GT)                          | ACGAGGAGGTGGACGAGATG <b>TTC</b> CGGGAGGCGCC  |
| RLC Y142E/F rev primer (GT)                        | CATCTCGTCCACCTCCTCGTCAGTGAACCT               |
| RLC Y155E fwd primer (GT)                          | ACAAGAAGGGCAACTTCAAC <b>GAA</b> GTGGAGTTCAC  |
| RLC Y155F fwd primer (GT)                          | ACAAGAAGGGCAACTTCAAC <b>TTT</b> GTGGAGTTCAC  |
| RLC Y155E/F rev primer (GT)                        | GTTGAAGTTGCCCTTCTTGTCGATGGGCGC               |
| Fwd primer to clone RLC mutants into pCDNA3-FLAG   | CGAGCTCGGATCCATGTCCAGCAAACGTGCCAAA           |
| Rev primer to clone RLC mutants into pCDNA3-FLAG   | ATATCTGCAGAATTCCTAATCGTCCTTGTCTTAGCTCC       |
| Fwd primer to clone FLAG-RLC mutants into pGEX-6P1 | AAAAAGAATTCATGGACTACAAGGACGACGATGACA         |
| Rev primer to clone FLAG-RLC mutants into pGEX-6P1 | TTTTTGCGGCCGCCTAATCGTCCTTGTCTTAGCTCCGTGC     |

**Table S1. Primers. Related to STAR Methods.**
